# Supplementary material for: Osteotropism of neuroendocrine tumors: role of the CXCL12/CXCR4 pathway in promoting EMT in vitro
Source: PubMed Central journal article supplement (PMC5410243; doi:10.18632/oncotarget.15122), 2017-02-06
Supplement: oncotarget-08-22534-s001.pdf [file oncotarget-08-22534-s001.pdf]

## Osteotropism of neuroendocrine tumors: role of the CXCL12/CXCR4 pathway in promoting EMT *in vitro*

### Supplementary Materials

**Supplementary Table 1: Primer sequences used for RT-PCR experiments**

| Gene        | Forward primer 5' > 3'    | Reverse primer 5' > 3'     |
|-------------|---------------------------|----------------------------|
| CTGF        | GGCCTCTTCTGTGACTTCGG      | CTCTGGAAGGACTCTCCGCT       |
| CXCR4       | TGGGTGGTTGTGTTCCAGTT      | TTGGAGTGTGACAGCTTGGA       |
| E-CAD       | AGCAGAACTAACACACGGGG      | ACCCACCTCTAAGGCCATCT       |
| EPCAM       | AGCGAGTGAGAACCTACTGGA     | CGCGTTGTGATCTCCTTCTGA      |
| IL-11       | TGAGCCTGTGGCCAGATACAGC    | AGGTTGTGGTCCCCGTCAGC       |
| MMP9        | ACTTTGACAGCGACAAGAAGTGGG  | ATGCCATTCACGTCGTCCTTATGC   |
| MMP13       | TTGAGCTGGACTCATTGTCGGGC   | TCTCGGAAGCCTCTCAGTCATGGAG  |
| N-CAD       | CCAGCCTCCAACCTGGTATCTT    | TCTACTGCATGTGCCCTTAA       |
| PTHrP       | GTCTCAGCCGCCGCTCAA        | GGAAGAATCGTCGCCGTAAA       |
| RANK        | ATTCTGCTTCTCTTCGCGTCTGTGG | ACTGACACAACCTGTCACCTGAGGAC |
| SNAIL       | CCAGACCCACTCAGATGTCAA     | GGACTCTTGGTGCTTGTGGA       |
| TGF $\beta$ | CGCGTGCTAATGGTGGAAC       | GTTCAGGTACCGCTTCTCGG       |

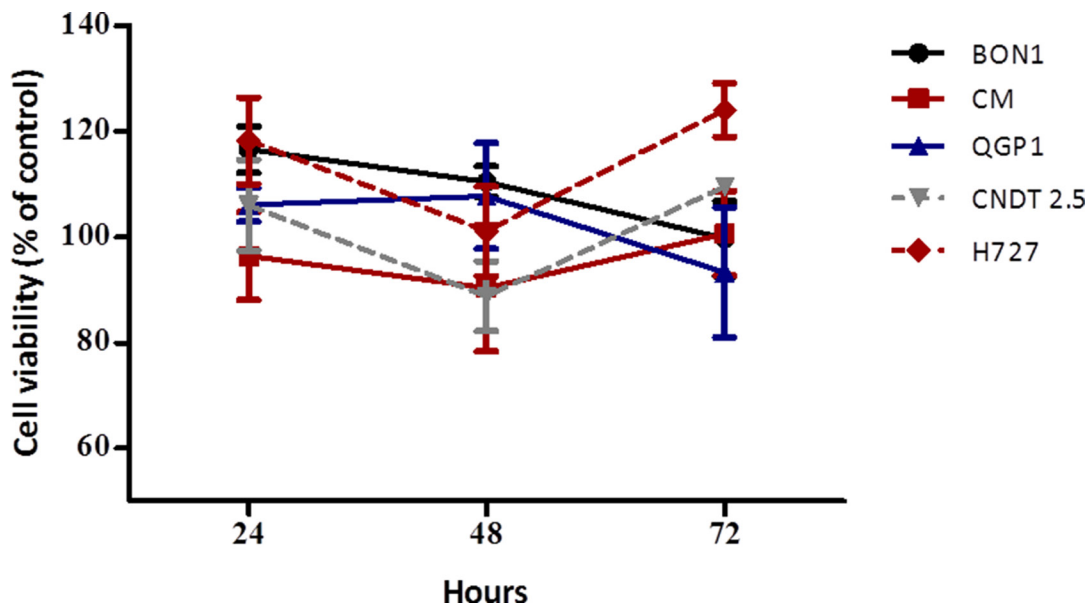

**Supplementary Figure 1: Proliferation of NET cells is not influenced by CXCL12.** CXCL12 at 100 ng/ml did not induce any modifications in NET.

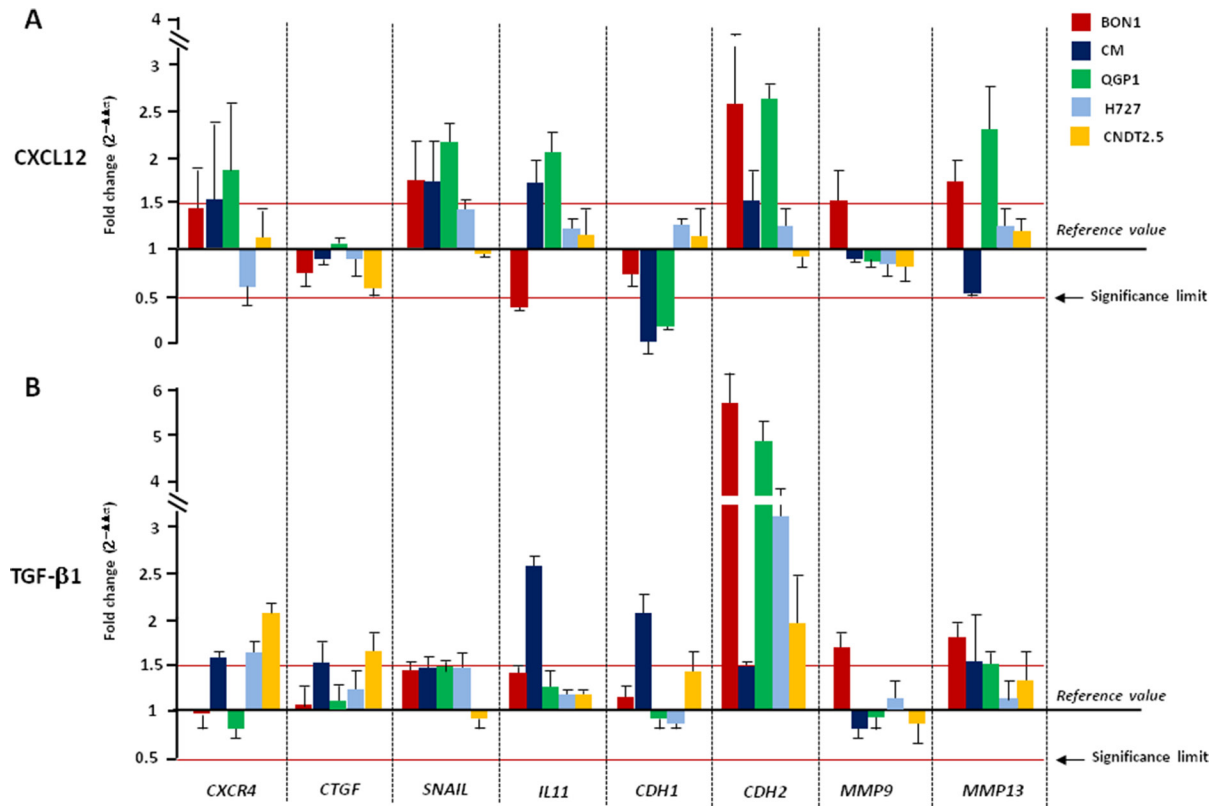

**Supplementary Figure 2: CXCL12 and TGF-β1 elicit EMT.** After 24 hr-incubation, both CXCL12 (A) and TGF-β1 (B) alter the EMT transcriptional profile of CXCR4<sup>high</sup>/CXCL12<sup>low</sup> NET cell lines, paralleling the data obtained from 2 hr-treatment experiments. Data are presented as mean ± SD, with β-actin as housekeeping gene. Statistical significance is marked by red lines.

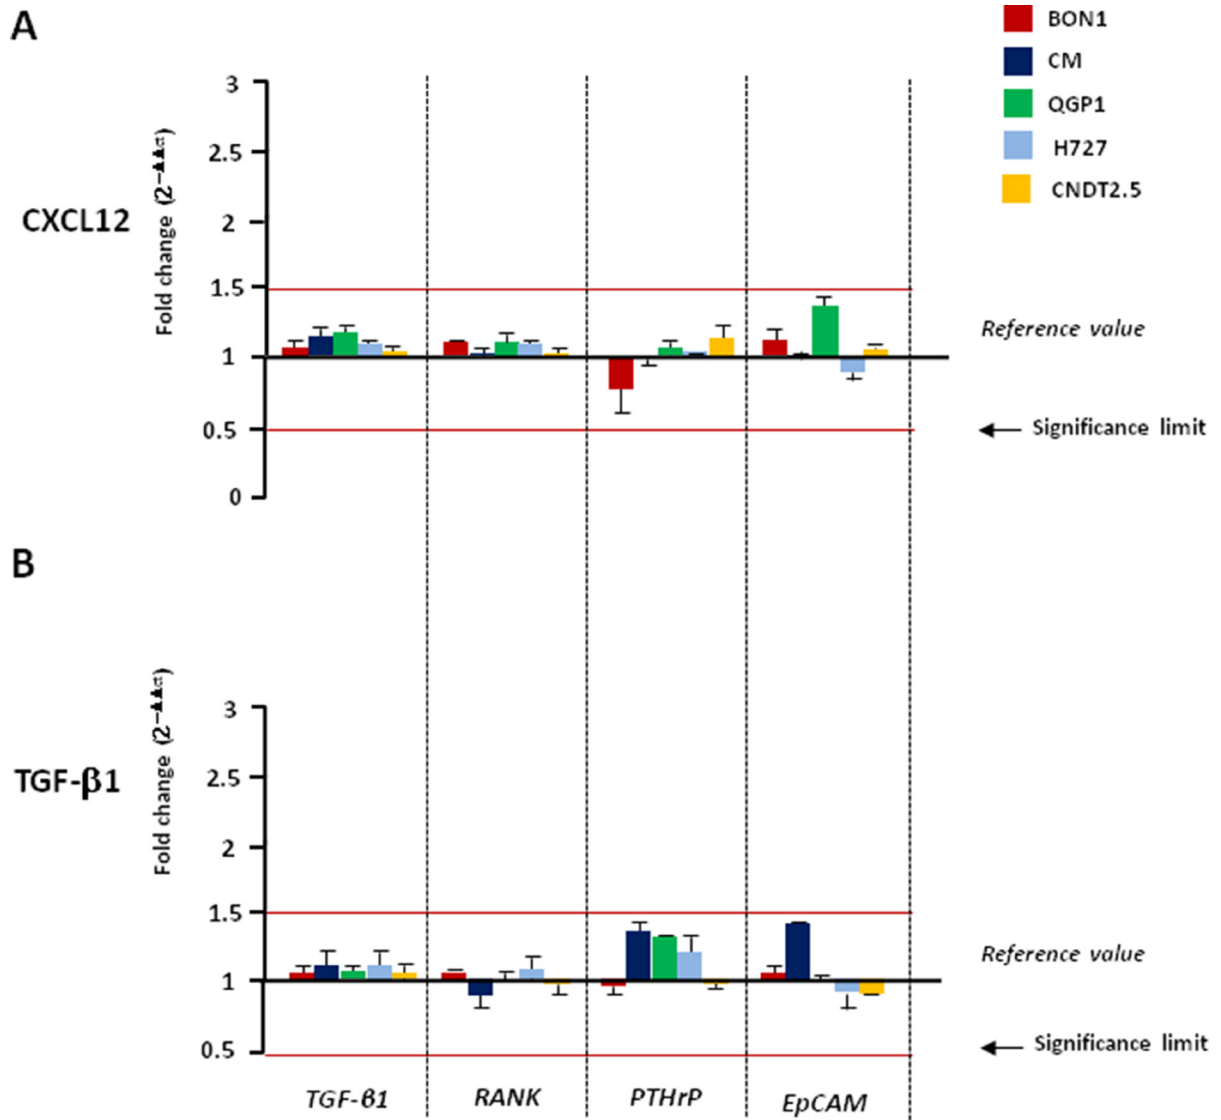

**Supplementary Figure 3: CXCL12 or TGF-β1 do not affect the transcription of *TGF-β1*, *RANK*, *PTHrP*, and *EpCAM*.** Incubation for 2 hours with CXCL12 (A) or TGF-β1 (B) did not significantly alter the transcript levels of *TGF-β1*, *RANK*, *PTHrP*, and *EpCAM*. Data are expressed by  $2^{-\Delta\Delta CT}$  method and presented as mean  $\pm$  SD. Statistical significance is marked by red lines.

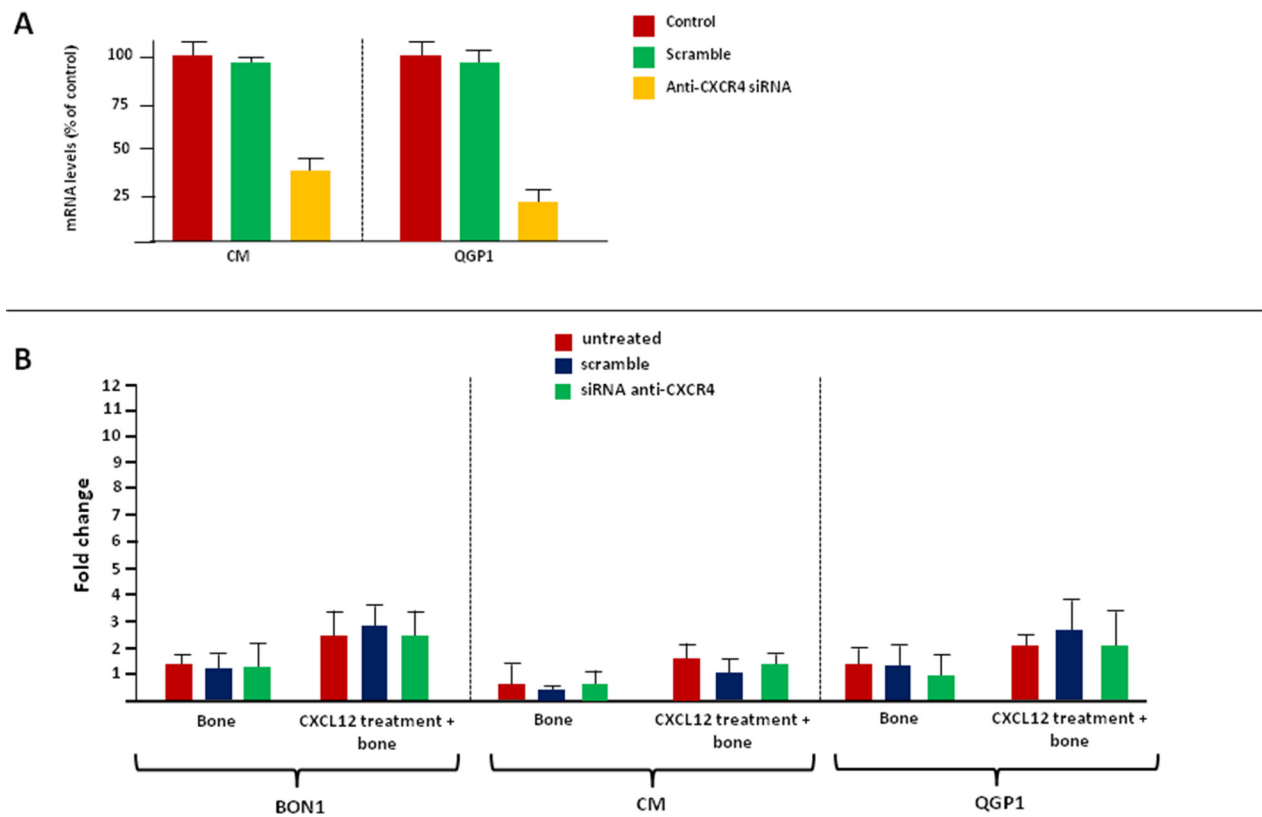

**Supplementary Figure 4: Silencing of CXCR4 via siRNA is effective and downregulates the invasive properties of NET cells.** (A) mRNA levels of CXCR4 were reduced up to 80% in cells treated with the anti-CXCR4 siRNA. (B) Invasiveness of the CXCR4<sup>high</sup>/CXCL12<sup>low</sup> cell lines was suppressed after silencing of CXCR4. Data are expressed as mean  $\pm$  SD, and were calculated on at least three different experiments.

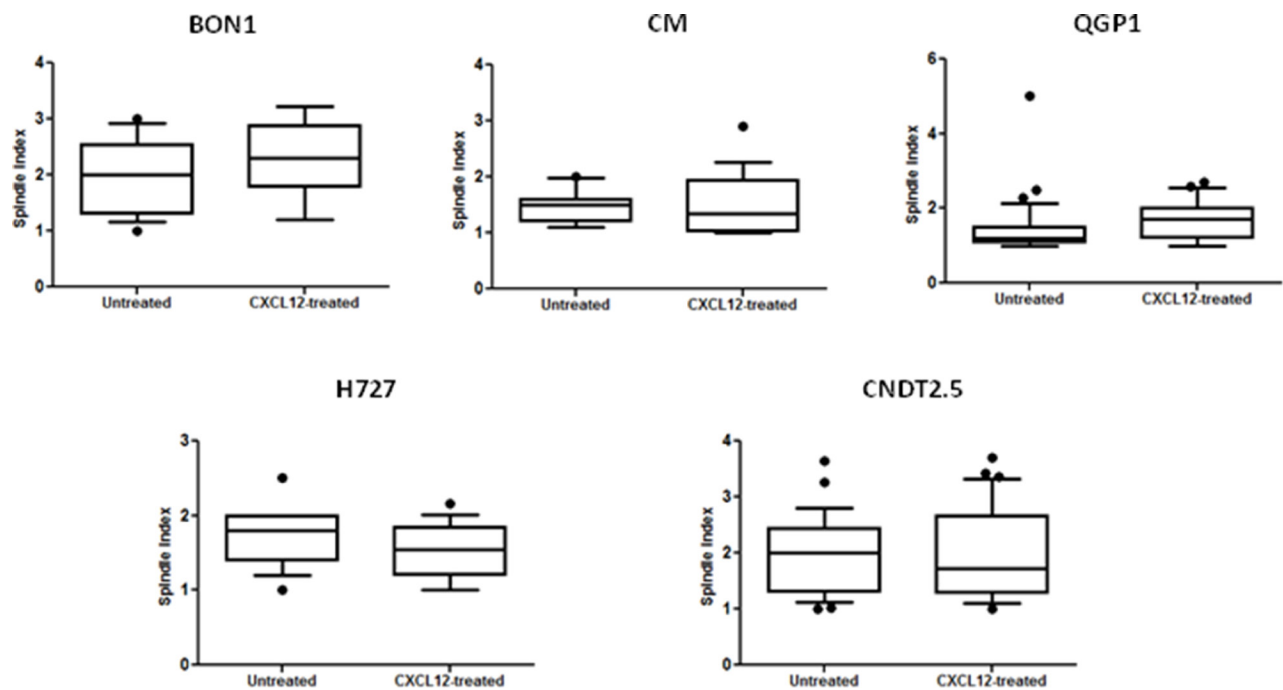

**Supplementary Figure 5: Silencing of CXCR4 inhibits the morphologic modifications induced by CXCL12 in NET cells.** No changes of the spindle index were observed in NET cells treated with CXCL12 following silencing of CXCR4 via siRNA. Mean, 95% confidence interval and outliers are depicted by box and whisker plots.
